# Supplementary material
Source: Springer Nature journal article supplement (https://www.springermedizin.de/resource/supplementary/13601_2014_1061_MOESM4_ESM.pdf/9678612)
Supplement: MOESM4 [file 9678612]

# General overview

Look at the "whole picture"

- Genuine sensitization
- Cross-reactivity
- Risk assessment (CEFA, OAS, anaphylaxis....)
- Identification of unanticipated triggers

Relevance of negative results

- Rules out sensitization to most relevant inhalant and food allergens
- If high clinical of allergy to an allergenic source contained in multiplex array consider other molecules (so far identified or not) not included or underrepresented (e.g. . TLP, enolase, beta-1,3-glucanase,  $\alpha$ -gal...)

# Respiratory allergy

Specific markers

- Consider AIT only if markers of specific genuine sensitization are positive and in accordance with clinical symptoms

Cross-reactive allergens

- May explain non-clinically relevant polysensitization.
- If only selective recognition to cross-reactive allergens AIT should probably not be prescribed

Cross-reactive allergens responsible for plant-food syndromes

- If no clinical symptoms upon food ingestion , no avoidance is required. Just follow-up for possible symptoms with plant foods

# Food allergy

Allergens associated with risk of severe reactions

- High risk (but may be asymptomatic or mild): nsLTP, nut storage proteins
- Low risk (but may be severe): PR10
- If delayed red meat anaphylaxis, assess sIgE to  $\alpha$ -gal (not included in commercial multiplex array)

Allergens associated to CEFA (nsLTP,  $\omega$ 5-gliadin)

- Avoidance of co-factors before/after the consumption of wheat/fruits& vegetables may be advised if previous CEFA

Cross-reactive food – food & pollen-food allergens (nsLTP, PR10, TLP, parvalbumins, tropomyosins)

- If no clinical symptoms upon food ingestion, no avoidance is required. Just follow-up for possible symptoms with other foods (identifying unanticipated allergen triggers)
- If positive sIgE to natural purified allergens and no clinical symptoms upon exposure to the allergenic source, check for CCD cross-reactivity

# Latex allergy

Genuine latex allergens Hev b 1, 3, 5 & 6

- If positive, confirm latex allergy and avoidance measures should be advised

Latex profilin Hev b 8 CCD

- In asymptomatic patients, if positive for Hev b 8 and negative for genuine latex allergens no avoidance measures should be advised. False latex allergy
